# Supplementary material for: Perilipin2 plays a positive role in adipocytes during lipolysis by escaping proteasomal degradation
Source: PubMed Central journal article supplement (PMC4753471; doi:10.1038/srep20975), 2016-02-15
Supplement: srep20975-s1.pdf [file srep20975-s1.pdf]

## Supplementary Information

### **Perilipin2 plays a positive role in adipocytes during lipolysis by escaping proteasomal degradation**

Yu Takahashi<sup>1,\*†</sup>, Akihiro Shinoda<sup>1,\*†</sup>, Haruhiko Kamada<sup>2,3</sup>, Makoto Shimizu<sup>1</sup>, Jun Inoue<sup>1</sup> & Ryuichiro Sato<sup>1,‡</sup>

<sup>1</sup>Department of Applied Biological Chemistry, Graduate School of Agricultural and Life Sciences, The University of Tokyo, Tokyo, Japan

<sup>2</sup>Laboratory of Biopharmaceutical Research, National Institute of Biomedical Innovation, Osaka, Japan

<sup>3</sup>The Center for Advanced Medical Engineering and Informatics, Osaka University, Osaka, Japan

\*These authors contributed equally to this work.

†Present address: Japan Tobacco Inc., Central Pharmaceutical Research Institute, 1-1 Murasaki-cho, Takatsuki, Osaka, Japan

‡Correspondence and requests for materials should be addressed to R. S. (e-mail: aroysato@mail.ecc.u-tokyo.ac.jp)

## Supplementary Fig. S1

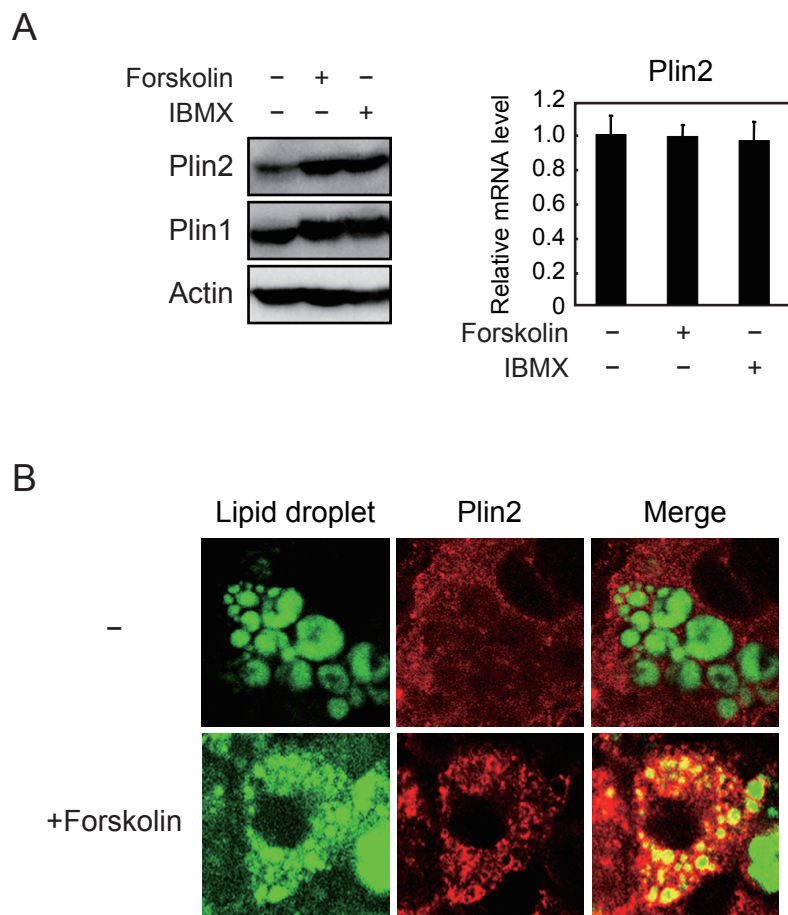

**Supplementary Fig. S1. Plin2 is stabilized at the protein level and localizes on LDs after lipolytic stimuli in 3T3-L1 adipocytes.** (A) 3T3-L1 cells differentiated into adipocytes for 7 days were treated with 10  $\mu$ M forskolin or 500  $\mu$ M IBMX for 12 h. Each protein level from whole cell extracts was determined using Western blot analysis (left). The Plin2 mRNA level was determined using quantitative RT-PCR and normalized to 18s rRNA levels. These data represent the means  $\pm$  S.D. The assay was performed in triplicate (right). (B) 3T3-L1 cells differentiated into adipocytes for 8 days were treated with 10  $\mu$ M forskolin for 24 h. The cells were stained with BODIPY 493/503 (green, LDs) and anti-Plin2 antibody (red), and then underwent confocal image analysis as described in the Material and Methods.

## Supplementary Fig. S2

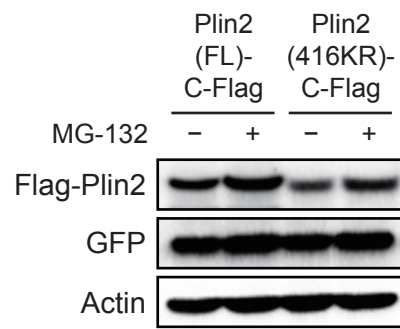

### **Supplementary Fig. S2. Lysine residues are not critical for protein degradation of murine Plin2.**

NIH-3T3 cells infected with either an Plin2-C-Flag or an Plin2(416KR)-C-Flag (All 29 lysine residues were substituted for alanine) lentiviral expression vector were treated with 10  $\mu$ M MG-132 for 12 h. Each protein level from whole cell extracts was detected using Western blot analysis with anti-Flag, anti-GFP, and anti-actin antibodies.
